# Supplementary material for: Modern perioperative medicine – past, present, and future
Source: PubMed Central journal article supplement (PMC8059350; doi:10.1515/iss-2019-0014), 2019-12-05
Supplement: iss-04-20190014-s001.pdf [file iss-04-20190014-s001.pdf]

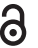

## Reviewer Assessment

Harry F. Dean, Fiona Carter and Nader K. Francis\*

# Modern perioperative medicine – past, present, and future

<https://doi.org/10.1515/iss-2019-0014>

Received August 15, 2019; accepted September 16, 2019

**\*Corresponding author: Nader K. Francis**, Department of General Surgery, Yeovil District Hospital, Higher Kingston, Yeovil BA21 4AT, UK; Enhanced Recovery after Surgery Society (UK) c.i.c., Yeovil BA20 2RH, UK; and School of Social and Community Medicine, University of Bristol, Canynge Hall, 39 Whatley Road, Bristol BS8 2PS, UK, Tel.: (01935) 384244, E-mail: [nader.francis@ydh.nhs.uk](mailto:nader.francis@ydh.nhs.uk). <https://orcid.org/0000-0001-8498-9175>

## Editor Comments to Original Submission

---

|                                            |               |
|--------------------------------------------|---------------|
| <b>Recommendation Term:</b>                | <b>Accept</b> |
| <b>Overall Reviewer Manuscript Rating:</b> | <b>95</b>     |

---

This is an excellent review of the topic showing great knowledge of the past and future development of perioperative medicine!
